# Supplementary material for: Exploratory study of the global intent to accept COVID-19 vaccinations
Source: PubMed Central journal article supplement (PMC9053214; doi:10.1038/s43856-021-00027-x), 2021-09-09
Supplement: 43856_2021_27_MOESM5_ESM.pdf [file 43856_2021_27_MOESM5_ESM.pdf]

## **Description of Additional Supplementary Files**

**File Name:** Supplementary Data 1

**Description:** Supplementary Data 1 provides cross tabs for vaccination intent by socio-demographic status for each of the countries used in the study.

**File Name:** Supplementary Data 2

**Description:** Supplementary Data 2 provides two excel sheets that contain (a) country codes used in the article and (b) all random-effect (country-specific) parameters from our final intercepts-as-outcomes multilevel model.

**File Name:** Supplementary Data 3

**Description:** Supplementary Data 3 contains all raw data that are used to create the manuscript figures.
